# Supplementary material for: H2O2-mediated fluorescence quenching of double-stranded DNA templated copper nanoparticles for label-free and sensitive detection of glucose
Source: Royal Society of Chemistry journal article supplement (doi:10.1039/c5ra14852a), 2015-01-01
Supplement: c5ra14852a1.pdf [file c5ra14852a1.pdf]

**Electronic Supplementary Information (ESI)**  
**for**  
**H<sub>2</sub>O<sub>2</sub>-mediated fluorescence quenching of double-stranded**  
**DNA templated copper nanoparticles for label-free and**  
**sensitive detection of glucose**

Hai-Bo Wang\*, Hong-Ding Zhang, Ying Chen, Yang Li, Tian Gan

*College of Chemistry and Chemical Engineering, Xinyang Normal University,  
Xinyang 464000, PR China*

Tel.: +86 376 6391172; Fax: +86 376 6391172.

E-mail address: wanghaibohn@163.com (H.-B. Wang).

**Exploration of fluorescence quenching mechanism**

According to the results discussed above, H<sub>2</sub>O<sub>2</sub> could strongly quench the fluorescence intensity of ds-DNA templated Cu NPs. The probable quenching mechanism might be attributed to oxidation of ds-DNA templated Cu NPs by H<sub>2</sub>O<sub>2</sub>. According to the previous report,<sup>S1</sup> the reactions might proceed as follows:

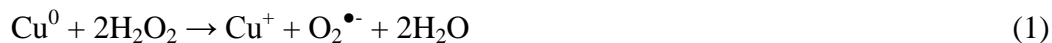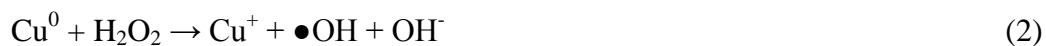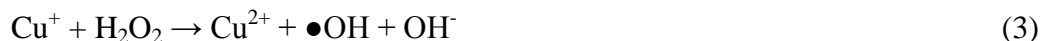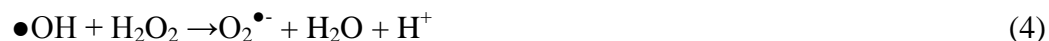

Some reactive intermediates such as hydroxyl radical (•OH) or superoxide anion radical (O<sub>2</sub><sup>•-</sup>) were generated in the reaction between H<sub>2</sub>O<sub>2</sub> and Cu NPs. In addition, hydroxyl radical and superoxide anion radical were strong oxidizing species. Thus, these reactions could lead to an effective fluorescence quenching of Cu NPs.

## References

- S1 Y. Ling, N. Zhang, F. Qu, T. Wen, Z. F. Gao, N. B. Li and H. Q. Luo, *Spectrochim. Acta A Mol. Biomol. Spectrosc.*, 2014, **118**, 315-320.

**Table S1** Determination results of glucose in spiked human serum samples ( $n = 3$ ).

| Spiked (mM) | Found (mM) | RSD (%) | Recovery (%) |
|-------------|------------|---------|--------------|
| 0           | 5.34       | 3.5     | –            |
| 2           | 7.38       | 2.9     | 100.5        |
| 5           | 10.05      | 3.2     | 97.2         |
| 10          | 15.87      | 2.6     | 103.5        |
